# Supplementary material for: Predictors of health-related quality of life in stroke patients after neurological inpatient rehabilitation: a prospective study
Source: Springer Nature journal article supplement (doi:10.1186/s12955-015-0258-9), 2015-05-13
Supplement: MOESM1 [file 9764058]

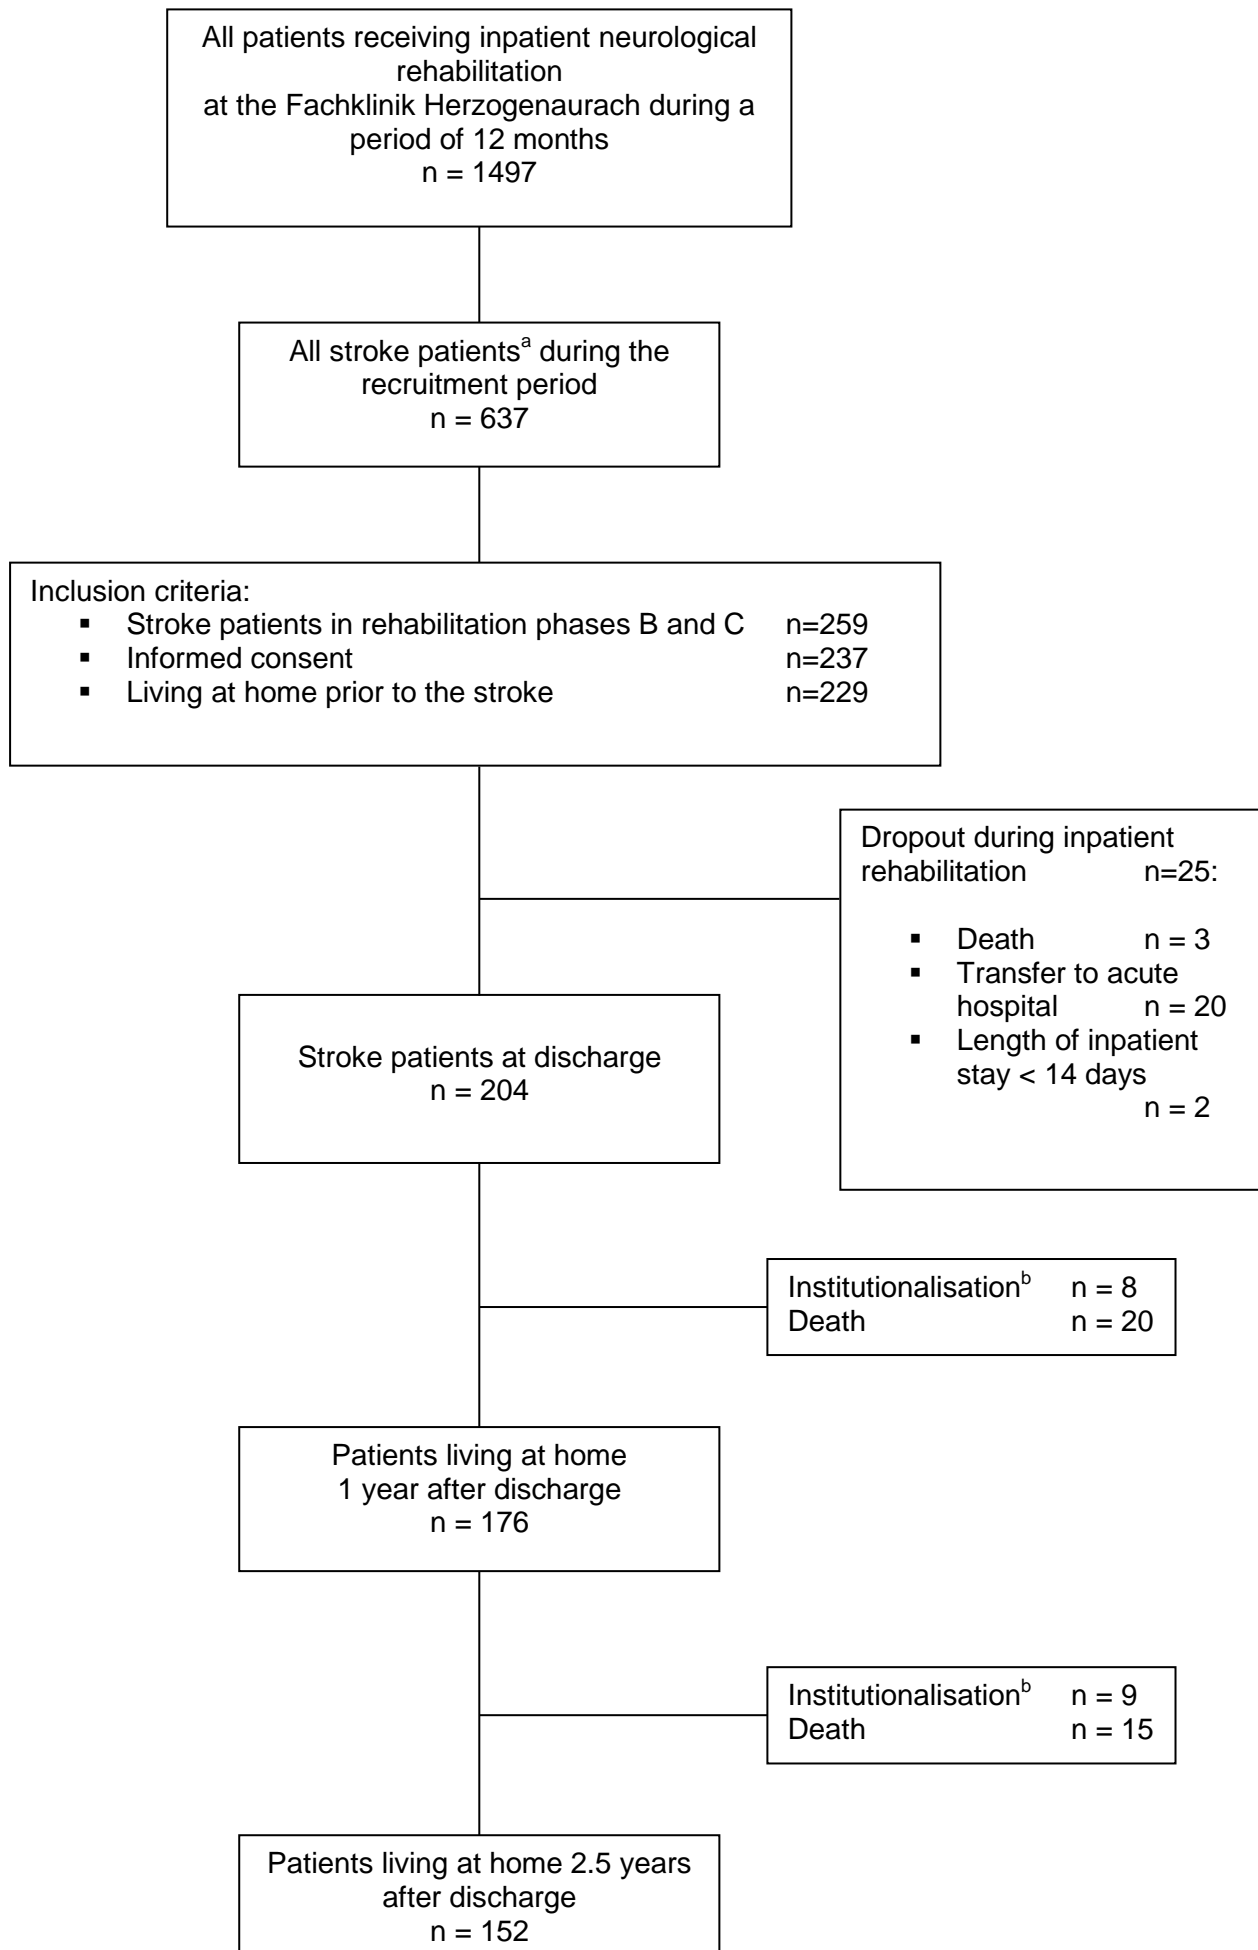

<sup>a</sup> Stroke according to WHO definition: ischemic stroke, intracerebral haemorrhage, subarachnoid haemorrhage, cerebral or sinus venous thrombosis

<sup>b</sup> Nursing home admission
