# Supplementary material for: Predictors of health-related quality of life in stroke patients after neurological inpatient rehabilitation: a prospective study
Source: Springer Nature journal article supplement (doi:10.1186/s12955-015-0258-9), 2015-05-13
Supplement: MOESM3 [file 9764058]

**Table 1** Patients' characteristics and bivariate analysis

| Independent variable                   | Cohort<br><i>n</i> = 152<br>Mean (SD) or <i>n</i> ( <i>n</i> %) | Correlation with dependent variable                                                                |                                                                                                       |
|----------------------------------------|-----------------------------------------------------------------|----------------------------------------------------------------------------------------------------|-------------------------------------------------------------------------------------------------------|
|                                        |                                                                 | EQ-5D (European Index)<br>1 year after discharge<br><i>r<sub>p</sub></i> ( <i>p</i> ) <sup>a</sup> | EQ-5D (European Index)<br>2.5 years after discharge<br><i>r<sub>p</sub></i> ( <i>p</i> ) <sup>a</sup> |
| <i>Sociodemographic variables</i>      |                                                                 |                                                                                                    |                                                                                                       |
| Age (in years)                         | 67.4 (11.1)                                                     | -0.01 (0.93)                                                                                       | -0.05 (0.51)                                                                                          |
| Sex (female)                           | 60 (39.5%)                                                      | -0.11 (0.16)                                                                                       | -0.12 (0.14)                                                                                          |
| <i>Clinical variables</i>              |                                                                 |                                                                                                    |                                                                                                       |
| Rehabilitation phase (B) <sup>b</sup>  | 18 (11.8%)                                                      | 0.07 (0.36)                                                                                        | 0.04 (0.59)                                                                                           |
| BI at discharge                        | 73.0 (16.6)                                                     | 0.27 (0.001)*                                                                                      | 0.31 (<0.001)*                                                                                        |
| BI change <sup>c</sup>                 | 30.6 (15.2)                                                     | 0.04 (0.66)                                                                                        | 0.09 (0.27)                                                                                           |
| EBI at discharge                       | 17.5 (5.3)                                                      | 0.09 (0.29)                                                                                        | 0.19 (0.019)*                                                                                         |
| EBI change <sup>c</sup>                | 3.4 (4.2)                                                       | -0.08 (0.36)                                                                                       | 0.09 (0.28)                                                                                           |
| ERBI at admission <sup>d</sup>         |                                                                 |                                                                                                    |                                                                                                       |
| - Communication disorder               | 18 (11.8%)                                                      | -0.02 (0.84)                                                                                       | 0.03 (p=0.70)                                                                                         |
| - Dysphagia                            | 21 (13.8%)                                                      | -0.18 (0.028) <sup>#</sup>                                                                         | -0.25 (0.002)*                                                                                        |
| ERBI at discharge <sup>e</sup>         |                                                                 |                                                                                                    |                                                                                                       |
| - Communication disorder               | 9 (5.9%)                                                        | -0.07 (0.40)                                                                                       | -0.04 (0.60)                                                                                          |
| - Dysphagia                            | 9 (5.9%)                                                        | -0.09 (0.25)                                                                                       | -0.09 (0.27)                                                                                          |
| Body mass index                        | 27 (4.3)                                                        | 0.03 (0.75)                                                                                        | 0.004 (0.96)                                                                                          |
| Nutritional Risk Screening             | 2.1 (1.8)                                                       | -0.16 (0.048) <sup>#</sup>                                                                         | -0.16 (0.06)                                                                                          |
| Scale assessing risk of falls:         |                                                                 |                                                                                                    |                                                                                                       |
| - Runge and Rehfeld (1998)             | 5.2 (3.1)                                                       | -0.38 (<0.001)*                                                                                    | -0.45 (<0.001)*                                                                                       |
| - Oliver et al. (STRATIFY, 1997)       | 1.0 (1.1)                                                       | -0.21 (0.010)*                                                                                     | -0.24 (0.003)*                                                                                        |
| Stroke yes/no                          |                                                                 | 0.05 (0.54)                                                                                        | -0.03 (0.74)                                                                                          |
| - yes                                  | 124 (81.6%)                                                     |                                                                                                    |                                                                                                       |
| TOAST classification <sup>f</sup>      |                                                                 | -0.02 (0.87)                                                                                       | -0.12 (0.17)                                                                                          |
| - Atherosclerosis                      | 14 (11.3%)                                                      |                                                                                                    |                                                                                                       |
| - Cardiac embolism                     | 22 (17.7%)                                                      |                                                                                                    |                                                                                                       |
| - Microangiopathy                      | 38 (30.6%)                                                      |                                                                                                    |                                                                                                       |
| - Other aetiology/ unknown aetiology   | 50 (40.3%)                                                      |                                                                                                    |                                                                                                       |
| Ischemic stroke location               |                                                                 | 0.25 (0.003)*                                                                                      | 0.18 (0.030) <sup>#</sup>                                                                             |
| - unilateral right                     | 59 (40.7%)                                                      |                                                                                                    |                                                                                                       |
| - Unilateral left                      | 74 (51.0%)                                                      |                                                                                                    |                                                                                                       |
| - bilateral                            | 12 (8.3%)                                                       |                                                                                                    |                                                                                                       |
| Charlson Index                         | 2.8 (1.2)                                                       | -0.11 (0.20)                                                                                       | -0.18 (0.027) <sup>#</sup>                                                                            |
| <i>Health-related quality of life</i>  |                                                                 |                                                                                                    |                                                                                                       |
| SF-36 <sub>p</sub> at admission        | 30.5 (8.0)                                                      | 0.30 (<0.001)*                                                                                     | 0.29 (<0.001)*                                                                                        |
| SF-36 <sub>p</sub> at discharge        | 37.3 (9.0)                                                      | 0.33 (<0.001)*                                                                                     | 0.26 (0.001)*                                                                                         |
| SF-36 <sub>m</sub> at admission        | 39.1 (9.9)                                                      | -0.04 (0.61)                                                                                       | -0.10 (0.24)                                                                                          |
| SF-36 <sub>m</sub> at discharge        | 45.4 (10.7)                                                     | 0.15 (0.06)                                                                                        | 0.23 (0.005)*                                                                                         |
| SF-36 <sub>p</sub> change <sup>c</sup> | 6.8 (9.2%)                                                      | 0.06 (0.45)                                                                                        | 0.001 (0.99)                                                                                          |
| SF-36 <sub>m</sub> change <sup>c</sup> | 6.3 (13.0%)                                                     | 0.16 (0.05)                                                                                        | 0.26 (0.001)*                                                                                         |
| EQ-5D at discharge                     | 66.7 (19.5)                                                     | 0.38 (<0.001)*                                                                                     | 0.42 (<0.001)*                                                                                        |
| EQ-5D change <sup>c</sup>              | 21.4 (25.2%)                                                    | 0.10 (0.21)                                                                                        | 0.15 (0.07)                                                                                           |

Abbreviations: *SD*, Standard deviation; *n* (*n*%), absolute frequency (relative frequency); *r<sub>p</sub>*, Pearson correlation coefficient; *BI*, Barthel Index; *EBI*, Extended Barthel Index; *ERBI*, Early Rehabilitation Barthel Index; *SF-36<sub>p</sub>*, SF-36 physical component summary score; *SF-36<sub>m</sub>*, SF-36 mental component summary score; *EQ-5D*, EuroQol 5 dimensions.

<sup>a</sup> Significant at *p* < 0.025 indicated by \*; *p*-values = 0.025 - 0.05 as a statistical trend indicated by <sup>#</sup>

<sup>b</sup> Patients in phase B in neurological rehabilitation (all other patients phase C)

<sup>c</sup> Discharge score minus admission score

<sup>d</sup> Others criteria of the Early Rehabilitation Barthel Index at admission:

intensive care treatment 2 (1.0%), tracheostomy 0 (0.0%), artificial respiration 1 (0.5%), disorientation 9 (4.4%), behavioural disorders 6 (2.9%)

<sup>e</sup> Other criteria of the Early Rehabilitation Barthel Index at discharge:

intensive care treatment 0 (0.0%), tracheostomy 0 (0.0%), artificial respiration 1 (0.5%), disorientation 4 (2.0%), behavioural disorders 3 (1.5%)

<sup>f</sup> Aetiological classification of ischemic stroke
