# Supplementary material for: Predictors of health-related quality of life in stroke patients after neurological inpatient rehabilitation: a prospective study
Source: Springer Nature journal article supplement (doi:10.1186/s12955-015-0258-9), 2015-05-13

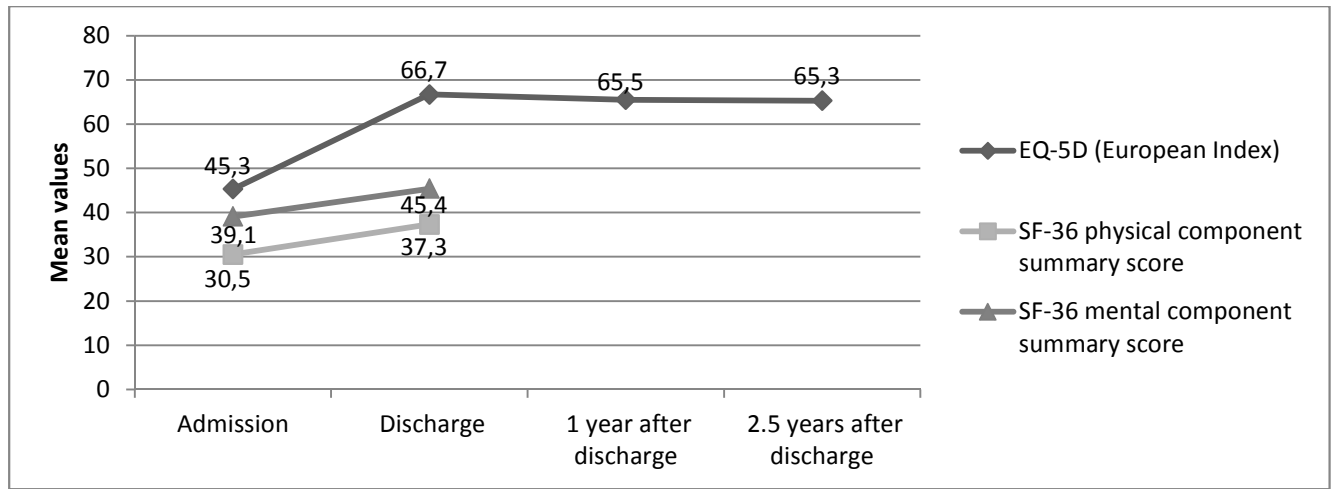

Supplement: MOESM4 [file 9764058]
