# Supplementary material for: Predictors of health-related quality of life in stroke patients after neurological inpatient rehabilitation: a prospective study
Source: Springer Nature journal article supplement (doi:10.1186/s12955-015-0258-9), 2015-05-13
Supplement: MOESM5 [file 9764058]

**Table 2** Frequencies of the dimensions of the EQ-5D. *n*=142

| Dimension                 | Admission <sup>a</sup> (t1) | Discharge <sup>a</sup> (t2) | t1 - t2    | 1 year after discharge (t3) | t2 - t3    | 2.5 years after discharge (t4) | t3 - t4    |
|---------------------------|-----------------------------|-----------------------------|------------|-----------------------------|------------|--------------------------------|------------|
| <i>Mobility</i>           |                             |                             |            |                             |            |                                |            |
| - no problems             | 24 (16.9%)                  | 62 (43.7%)                  |            | 90 (63.4%)                  |            | 100 (70.4%)                    |            |
| - some problems           | 101 (71.1%)                 | 77 (54.2%)                  |            | 50 (35.2%)                  |            | 39 (27.5%)                     |            |
| - confined to bed         | 17 (12.0%)                  | 3 (2.1%)                    |            | 2 (1.4%)                    |            | 3 (2.1%)                       |            |
| Improvement               |                             |                             | 57 (40.1%) |                             | 46 (32.4%) |                                | 22 (15.5%) |
| Deterioration             |                             |                             | 9 (6.3%)   |                             | 17 (12.0%) |                                | 13 (9.2%)  |
| <i>Self-care</i>          |                             |                             |            |                             |            |                                |            |
| - no problems             | 25 (17.6%)                  | 79 (55.6%)                  |            | 100 (70.4%)                 |            | 98 (69.0%)                     |            |
| - some problems           | 92 (64.8%)                  | 56 (39.4%)                  |            | 33 (23.2%)                  |            | 36 (25.4%)                     |            |
| - unable                  | 25 (17.6%)                  | 7 (4.9%)                    |            | 9 (6.3%)                    |            | 8 (5.6%)                       |            |
| Improvement               |                             |                             | 77 (54.2%) |                             | 37 (26.1%) |                                | 14 (9.9%)  |
| Deterioration             |                             |                             | 10 (7.0%)  |                             | 16 (11.3%) |                                | 16 (11.3%) |
| <i>Usual activities</i>   |                             |                             |            |                             |            |                                |            |
| - no problems             | 6 (4.2%)                    | 25 (17.6%)                  |            | 54 (38.0%)                  |            | 55 (38.7%)                     |            |
| - some problems           | 74 (52.1%)                  | 105 (73.9%)                 |            | 47 (33.1%)                  |            | 46 (32.4%)                     |            |
| - unable                  | 62 (43.7%)                  | 12 (8.5%)                   |            | 41 (28.9%)                  |            | 41 (28.9%)                     |            |
| Improvement               |                             |                             | 66 (46.4%) |                             | 44 (31.0%) |                                | 32 (22.5%) |
| Deterioration             |                             |                             | 6 (4.2%)   |                             | 42 (29.6%) |                                | 24 (16.9%) |
| <i>Pain/discomfort</i>    |                             |                             |            |                             |            |                                |            |
| - none                    | 53 (37.3%)                  | 87 (61.3%)                  |            | 87 (61.3%)                  |            | 72 (50.7%)                     |            |
| - moderate                | 84 (59.2%)                  | 52 (36.6%)                  |            | 49 (34.5%)                  |            | 62 (43.7%)                     |            |
| - extreme                 | 5 (3.5%)                    | 3 (2.1%)                    |            | 6 (4.2%)                    |            | 8 (5.6%)                       |            |
| Improvement               |                             |                             | 51 (35.9%) |                             | 31 (21.8%) |                                | 22 (15.5%) |
| Deterioration             |                             |                             | 16 (11.3%) |                             | 33 (23.2%) |                                | 37 (26.0%) |
| <i>Anxiety/depression</i> |                             |                             |            |                             |            |                                |            |
| - none                    | 41 (28.9%)                  | 74 (52.1%)                  |            | 75 (52.8%)                  |            | 70 (49.3%)                     |            |
| - moderate                | 89 (62.7%)                  | 63 (44.4%)                  |            | 61 (43.0%)                  |            | 63 (44.4%)                     |            |
| - extreme                 | 12 (8.5%)                   | 5(3.5%)                     |            | 6 (4.2%)                    |            | 9 (6.3%)                       |            |
| Improvement               |                             |                             | 54 (38.0%) |                             | 37 (26.1%) |                                | 25 (17.6%) |
| Deterioration             |                             |                             | 19 (13.4%) |                             | 37 (26.1%) |                                | 30 (21.1%) |

Collection of the complete HRQoL data until 2.5 years after discharge from neurological inpatient rehabilitation by telephone interview with 142 patients.

<sup>a</sup> Admission to and discharge from neurological inpatient rehabilitation
