# Supplementary material for: Predictors of health-related quality of life in stroke patients after neurological inpatient rehabilitation: a prospective study
Source: Springer Nature journal article supplement (doi:10.1186/s12955-015-0258-9), 2015-05-13
Supplement: MOESM6 [file 9764058]

**Table 3** Multivariate logistic regressions with the EQ-5D (European Index) 1 year and 2.5 years after discharge as the dependent variables.

| Independent variable                   | EQ-5D 1 year after discharge                     |          |                       | EQ-5D 2.5 years after discharge                  |          |                       |
|----------------------------------------|--------------------------------------------------|----------|-----------------------|--------------------------------------------------|----------|-----------------------|
|                                        | Regression coefficient <i>B</i> (95% <i>CI</i> ) | <i>t</i> | <i>p</i> <sup>a</sup> | Regression coefficient <i>B</i> (95% <i>CI</i> ) | <i>t</i> | <i>p</i> <sup>a</sup> |
| <i>Block I</i> <sup>b</sup>            |                                                  |          |                       |                                                  |          |                       |
| Age                                    | 0.04 (-0.27 - 0.34)                              | 0.22     | 0.82                  | -0.05 (-0.37 - 0.27)                             | -0.31    | 0.76                  |
| Sex <sup>c</sup>                       | -4.32 (-11.23 - 2.63)                            | -1.23    | 0.22                  | -6.18 (-13.38 - 1.03)                            | -1.70    | 0.09                  |
| EQ-5D at discharge                     | 0.27 (0.05 - 0.49)                               | 2.42     | 0.017*                | 0.24 (0.001 - 0.47)                              | 1.98     | 0.049 <sup>#</sup>    |
| <i>Block II</i> <sup>d</sup>           |                                                  |          |                       |                                                  |          |                       |
| BI at discharge                        | 0.09                                             | 1.02     | 0.31                  | 0.11                                             | 1.27     | 0.21                  |
| ERBI at admission, Dysphagia           | -0.05                                            | -0.58    | 0.56                  | -0.15                                            | -1.91    | 0.058                 |
| Nutritional Risk Screening             | -0.10                                            | -1.31    | 0.19                  | -0.09                                            | -1.20    | 0.23                  |
| Scale assessing risk of falls          |                                                  |          |                       |                                                  |          |                       |
| - Runge and Rehfeld                    | -1.77 (-3.14 - -0.41)                            | -2.57    | 0.011*                | -2.31 (-3.70 - -0.92)                            | -3.28    | 0.001*                |
| Charlson Index                         | -0.07                                            | -0.86    | 0.39                  | -0.13                                            | -1.79    | 0.08                  |
| SF-36 <sub>m</sub> change <sup>e</sup> | 0.05                                             | 0.61     | 0.54                  | 0.29 (0.003 - 0.58)                              | 1.99     | 0.048 <sup>#</sup>    |

Abbreviations: *EQ-5D*, EuroQol 5 Dimensions; *CI*, Confidence interval, *t*, Test statistic, *p*, *BI*, Barthel Index; *ERBI*, Early Rehabilitation Barthel Index; *SF-36<sub>m</sub>*, SF-36 mental component summary score.

<sup>a</sup> Significant at  $p < 0.025$  indicated by \*;  $p$ -values = 0.025 - 0.05 as a statistical trend indicated by <sup>#</sup>

<sup>b</sup> Adjustment variables using enter method

<sup>c</sup> Code: female = 0, male = 1

<sup>d</sup> Final regression model (variables in the equation) using stepwise forward selection

<sup>e</sup> Discharge score minus admission score
